# Supplementary material for: Absorption of N-acetylcysteine in Healthy and Mycoplasma gallisepticum-Infected Chickens
Source: MDPI journal article supplement (doi:10.3390/vetsci8110244), 2021-10-20
Supplement: s1 [file s1]

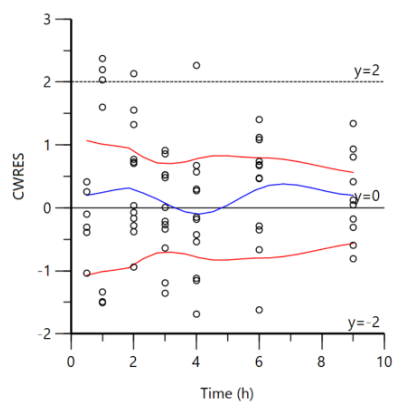

(a)

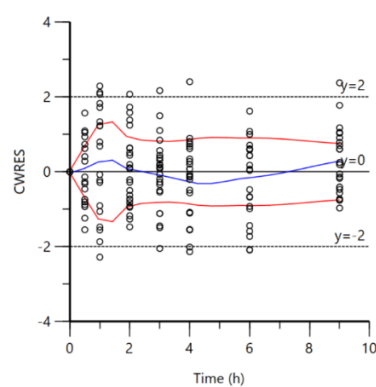

(b)

**Figure S1.** Plot of CWRES (conditional weighted residuals) against time after dose (**a**, groups treated solely with NAC and **b**, data for all four groups).

**Table S1.** Nutritional composition of the feed for broiler chickens administered during the treatment with NAC.

| Nutritional composition | %     |
|-------------------------|-------|
| Crude protein           | 18.95 |
| Crude fat               | 6.71  |
| Crude fiber             | 4.31  |
| Crude ash               | 5.26  |
| Calcium                 | 0.75  |
| Phosphorus              | 0.57  |
| Sodium                  | 0.16  |
| Lysine                  | 1.16  |
| Methionine              | 0.54  |

Ingredients: corn, soybean meal, sunflower meal, sunflower oil, sodium chloride, L-lysine hydrochloride, DL-methionine, monocalcium phosphate, calcium carbonate, L-threonine; Supplements: Supplied per kg diet: Fe 109.58 mg, Cu 7.05 mg, Zn 31.66 mg, Mn 15.76 mg, iodine 0.08 mg, selenium 0.02 mg, retinol acetate 10000 UI, cholecalciferol 4000 UI, choline chloride 402 mg.

**Table S2.** Plasma concentrations of N-acetylcysteine (NAC) in healthy broiler chickens treated with NAC through the feed for five consecutive days (received mean dose 41 mg.kg<sup>-1</sup> bw/12 h).

| Time (h) | 1    | 2    | 3    | 4    | 5    | 6    | Mean±SD   |
|----------|------|------|------|------|------|------|-----------|
| 0.5      | <LOQ | 0.63 | 0.41 | 0.70 | 0.71 | 0.37 | 0.50±0.20 |
| 1        | 0.19 | 0.19 | 2.21 | 3.38 | 3.56 | 3.09 | 2.10±1.55 |
| 2        | 2.74 | 2.13 | 1.66 | 4.26 | 3.32 | 1.65 | 2.63±1.03 |
| 3        | 0.44 | 1.78 | 1.54 | 3.19 | 3.75 | 2.56 | 2.21±1.20 |
| 4        | 0.91 | 1.53 | 3.64 | 1.78 | 3.06 | 2.16 | 2.18±1.01 |
| 6        | 1.10 | 0.82 | 0.88 | 1.44 | 2.75 | 1.85 | 2.12±1.84 |
| 9        | 0.57 | 0.75 | 0.72 | 0.83 | 1.75 | 1.08 | 0.95±0.43 |
| 12       | 2.61 | 0.94 | 1.85 | 3.38 | 1.35 | 3.60 | 2.29±1.08 |
| 14       | 1.43 | 0.80 | 1.23 | 1.81 | 3.35 | 2.60 | 1.87±0.95 |
| 24       | 2.78 | 2.70 | 1.34 | 1.40 | 2.72 | 1.74 | 2.11±0.70 |
| 120      | 3.10 | 0.00 | 1.10 | 2.57 | 1.60 | 1.17 | 1.59±1.11 |
| 122      | 1.92 | <LOQ | <LOQ | 1.63 | 1.00 | 1.66 | 1.09±0.79 |
| 124      | <LOQ      |
| 126      | <LOQ      |
| 132      | <LOQ      |
| 144      | <LOQ      |
| 152      | <LOQ      |
| 168      | <LOQ      |
| 174      | <LOQ      |

<LOQ – the concentration is below the limit of quantification for the used method.

**Table S3.** Plasma concentrations of N-acetylcysteine (NAC) in healthy broiler chickens treated with NAC through the feed (received mean dose 47.5 mg.kg<sup>-1</sup> bw/12 h) and doxycycline (20 mg.kg<sup>-1</sup> bw/24 h via drinking water) for five consecutive days.

| Time (h) | 1    | 2    | 3    | 4    | 5    | 6    | Mean±SD   |
|----------|------|------|------|------|------|------|-----------|
| 0.5      | 2.99 | 3.01 | 1.78 | 0.95 | 1.25 | 0.35 | 1.72±1.09 |
| 1        | 1.75 | 2.35 | 2.25 | 2.15 | 1.85 | 1.88 | 2.04±0.24 |
| 2        | 1.61 | 1.58 | 1.85 | 2.84 | 1.99 | 2.88 | 2.13±0.59 |
| 3        | 1.21 | 2.14 | 2.43 | 2.07 | 2.29 | 1.08 | 1.87±0.58 |
| 4        | 1.38 | 2.45 | 2.28 | 2.83 | 0.88 | 0.94 | 1.80±0.83 |
| 6        | 1.02 | 1.94 | 0.59 | 0.66 | 0.83 | 0.74 | 0.96±0.50 |
| 9        | 0.41 | 1.86 | <LOQ | 1.04 | 1.12 | 1.90 | 1.27±0.62 |
| 12       | 0.84 | 1.46 | 0.60 | 1.94 | 2.68 | 2.46 | 1.66±0.85 |
| 14       | 1.01 | 3.20 | 0.58 | 2.75 | 3.09 | 2.39 | 2.17±1.11 |
| 24       | 1.38 | 0.04 | 1.26 | 1.12 | 2.87 | 2.43 | 1.51±1.01 |
| 120      | 4.09 | 8.33 | 1.49 | <LOQ | 2.26 | 2.45 | 3.72±2.74 |
| 122      | 2.42 | 0.35 | 0.84 | <LOQ | <LOQ | 0.48 | 1.02±0.95 |
| 124      | 0.38 | <LOQ | <LOQ | <LOQ | <LOQ | <LOQ | 0.38±0.00 |
| 126      | <LOQ      |
| 132      | <LOQ      |
| 144      | <LOQ      |
| 152      | <LOQ      |
| 168      | <LOQ      |
| 174      | <LOQ      |

<LOQ – the concentration is below the limit of quantification for the used method.

**Table S4.** Plasma concentrations of N-acetylcysteine (NAC) in broiler chickens infected with *Mycoplasma gallisepticum* and treated with NAC through the feed for five consecutive days (received mean dose 43.29 mg.kg<sup>-1</sup> bw/12 h).

| Time (h) | 1    | 2    | 3    | 4    | 5    | 6    | 7    | 8    | 9    | 10   | Mean±SD   |
|----------|------|------|------|------|------|------|------|------|------|------|-----------|
| 0.5      | <LOQ | -    | <LOQ | -    | <LOQ | -    | <LOQ | <LOQ | -    | 0.33 | 0.33±0.00 |
| 1        | 0.32 | <LOQ | -    | <LOQ | -    | <LOQ | -    | -    | <LOQ | <LOQ | 0.32±0.00 |
| 2        | -    | 1.26 | 1.43 | -    | 1.62 | 2.34 | 0.88 | -    | 2.40 | -    | 1.66±0.60 |
| 3        | 0.31 | -    | 1.29 | 1.12 | -    | -    | 1.12 | 1.58 | -    | 1.84 | 1.21±0.52 |
| 4        | -    | 1.25 | -    | 1.20 | 2.04 | -    | -    | 0.76 | 0.30 | 0.63 | 1.03±0.61 |
| 6        | 1.26 | 1.33 | 1.63 | -    | 0.32 | 1.57 | -    | -    | 1.49 | -    | 1.26±0.48 |
| 9        | <LOQ | -    | -    | 0.36 | -    | 0.60 | 0.46 | 0.31 | -    | 0.62 | 0.47±0.14 |
| 12       | -    | 0.57 | 1.14 | -    | 4.92 | -    | 2.02 | -    | 2.84 | 3.80 | 2.55±1.64 |
| 14       | -    | 1.00 | 1.18 | 0.72 | -    | 0.98 | -    | 0.66 | 1.12 | -    | 0.94±0.21 |
| 24       | 1.68 | -    | -    | 2.08 | 1.88 | -    | 1.47 | 1.61 | -    | <LOQ | 1.74±0.24 |
| 120      | -    | 1.45 | 1.32 | -    | 0.70 | 0.97 | <LOQ | -    | 0.65 | -    | 1.02±0.36 |
| 122      | 0.61 | -    | 0.63 | <LOQ | -    | 0.96 | -    | 0.54 | -    | 0.32 | 0.61±0.23 |
| 124      | <LOQ | <LOQ | -    | <LOQ | <LOQ | -    | <LOQ | -    | <LOQ | -    | <LOQ      |
| 126      | -    | <LOQ | <LOQ | -    | -    | <LOQ | -    | <LOQ | <LOQ | <LOQ | <LOQ      |
| 132      |      |      |      |      |      |      |      |      |      |      |           |
| 144      |      |      |      |      |      |      |      |      |      |      |           |
| 152      |      |      |      |      |      |      |      |      |      |      |           |
| 168      |      |      |      |      |      |      | <LOQ |      |      |      |           |
| 174      |      |      |      |      |      |      |      |      |      |      |           |

-- concentrations were not determined (blood samples were not taken from the chicken at the given time interval); <LOQ – the concentration is below the limit of quantification for the used method.

**Table S5.** Plasma concentrations of N-acetylcysteine (NAC) in broiler chickens infected with *Mycoplasma gallisepticum* and treated with NAC through the feed (received mean dose 43.3 mg.kg<sup>-1</sup> bw/12 h) and doxycycline (20 mg.kg<sup>-1</sup> bw/24 h via drinking water) for five consecutive days.

| Time (h) | 1    | 2    | 3    | 4    | 5    | 6    | 7    | 8    | 9    | 10   | Mean±SD   |
|----------|------|------|------|------|------|------|------|------|------|------|-----------|
| 0.5      | 2.44 | -    | 2.00 | -    | 3.84 | -    | 1.73 | 0.63 | -    | 2.30 | 2.15±1.05 |
| 1        | 1.76 | 4.54 | -    | 7.34 | -    | 1.59 | -    | -    | 4.19 | 4.02 | 3.91±2.11 |
| 2        | -    | 4.95 | 1.75 | -    | 3.80 | 1.43 | 3.09 | -    | 6.36 | -    | 3.56±1.89 |
| 3        | 2.37 | -    | 2.32 | 8.15 | -    | -    | 2.71 | 1.68 | -    | 7.05 | 3.44±2.66 |
| 4        | -    | 1.54 | -    | 6.85 | 1.63 | -    | -    | 2.09 | 2.77 | 4.04 | 3.15±2.03 |
| 6        | 0.94 | 0.57 | 2.15 | -    | 2.15 | 1.20 | -    | -    | 3.15 | -    | 1.69±0.96 |
| 9        | 1.07 | -    | -    | 5.60 | -    | 1.04 | 1.91 | 1.44 | -    | 2.81 | 2.31±1.74 |
| 12       | -    | 1.00 | 3.30 | -    | 1.22 | -    | 1.43 | -    | 4.84 | 4.39 | 2.70±1.70 |
| 14       | -    | 1.23 | 1.10 | 2.51 | -    | 1.64 | -    | <LOQ | 3.92 | -    | 2.08±1.17 |
| 24       | 1.38 | -    | -    | 2.70 | 1.42 | -    | 2.24 | 1.80 | -    | 3.69 | 1.91±0.56 |
| 120      | -    | 0.83 | <LOQ | -    | 0.36 | 0.41 | 0.56 | -    | 0.90 | -    | 0.61±0.24 |
| 122      | 0.68 | -    | 0.48 | <LOQ | -    | 0.56 | -    | 0.67 | -    | <LOQ | 0.60±0.10 |
| 124      | <LOQ | <LOQ | -    | <LOQ | <LOQ | -    | <LOQ | -    | <LOQ | -    | <LOQ      |
| 126      | -    | <LOQ | <LOQ | -    | -    | <LOQ | -    | <LOQ | <LOQ | <LOQ | <LOQ      |
| 132      |      |      |      |      |      |      |      |      |      |      |           |
| 144      |      |      |      |      |      |      |      |      |      |      |           |
| 152      |      |      |      |      |      |      |      |      |      |      |           |
| 168      |      |      |      |      |      |      |      |      |      |      |           |
| 174      |      |      |      |      |      |      |      |      |      |      |           |

- - concentrations were not determined (blood samples were not taken from the chicken at the given time interval); <LOQ – the concentration is below the limit of quantification for the used method
